# Supplementary material
Source: PubMed Central journal article supplement (PMC3927480)
Supplement: supp_M040071_jlr.M040071-1.pdf [file supp_M040071_jlr.M040071-1.pdf]

## Online-only data supplement

**Table 1**

List of target peptides for each protein assessed

| Proteins | Target peptides             |
|----------|-----------------------------|
| ApoB-48  | GFEPTLEALFGK<br>EFQVPTFTIPK |
| MTP      | SNLNIFQYIGK<br>YDLPFITDEVK  |
| FABP-2   | LTITQEGNK<br>GTWSLEGNK      |
| FATP-4   | TVPIFASTVR<br>AAIVVHSR      |
| Villin   | AAVPDTVVEPALK<br>DPETPIIVVK |

ApoB-48: apolipoprotein B-48; MTP: microsomal triglyceride transfer protein; FABP-2: fatty acid binding protein 2; FATP-4: fatty acid transporter (member 4).
